# Supplementary material for: WIP and WICH/WIRE co-ordinately control invadopodium formation and maturation in human breast cancer cell invasion
Source: PubMed Central journal article supplement (PMC4806363; doi:10.1038/srep23590), 2016-03-24

# WIP and WICH/WIRE co-ordinately control invadopodium formation and maturation in human breast cancer cell invasion

Esther García, Chiara Ragazzini, Xinzi Yu, Elena Cuesta-García, Jorge Bernardino de la Serna, Tobias Zech, David Sarrió, Laura M. Machesky and Inés M. Antón

## SUPPLEMENTARY INFORMATION

### SUPPLEMENTAL TABLES

**Table S1.** Characteristics of BCC cell lines

| Cell line  | Gene cluster | ER/PR/HER2 expression | Tumor type | Culture medium                    |
|------------|--------------|-----------------------|------------|-----------------------------------|
| BT474      | luminal      | + / + / +             | IDC        | RPMI, FBS, In, NaHCO <sub>3</sub> |
| HS578T     | basal B      | - / - / -             | IDC        | DMEM, FBS, In                     |
| MCF7       | luminal      | + / + / -             | IDC        | DMEM, FBS                         |
| MDA-MB-157 | basal B      | - / - / -             | MC         | DMEM, FBS                         |
| MDA-MB-231 | basal B      | - / - / -             | AC         | DMEM, FBS                         |
| T47D       | luminal      | + / + / -             | IDC        | RPMI, FBS, SP, NaHCO <sub>3</sub> |
| SKBR3      | luminal      | - / - / +             | AC         | McCoy's 5A, FBS                   |

Tumor type: IDC, invasive ductal carcinoma; F, fibrocystic disease; MC, metaplastic carcinoma; AC, adenocarcinoma. Culture conditions: RPMI, Roswell Park Memorial Institute 1640 medium; DMEM, Dulbecco's modified Eagle's medium (both from Sigma); F-12, Ham's F12 nutrient mixture (Gibco); FBS, fetal bovine serum 10%; HS, horse serum 5% (both from Sigma); HC, hydrocortisone 0.5 mg/ml (Calbiochem); EGF, epidermal growth factor 20 ng/ml (Peprotech); In, insulin (10 µg/ml, Gibco); NaHCO<sub>3</sub> 0.075% (Sigma); SP, sodium pyruvate (1 mM, Sigma)

## SUPPLEMENTAL FIGURE LEGENDS

**Figure S1. Expression of WIP family proteins in BCC and WIP- and WIRE-deficient cells.** (a) Relationship between WIP mRNA levels and BCC invasive behavior (1). (b) WIP mRNA levels in basal-B, basal-A and luminal BCC (2). (c) MDA-MB-231 cells were transduced with lentiviral particles containing different shRNA-coding plasmids that target WIP or WIRE. Representative WB in which cell lysates (30  $\mu$ g/lane) were examined using anti-WIP, -WIRE and -GAPDH antibodies. (d) Quantification of WIP and WIRE expression after depletion. Data shown as mean  $\pm$  SD of at least three independent experiments. \*\* p <0.01, \*\*\* p <0.001 by 1-way ANOVA and Tukey's post-hoc test.

**Figure S2. Disruption of Nck binding to WIP leads to opposite phenotypes in control and WIRE-deficient cells.** Orthogonal views of cells shown in Figure 5. (a) MDA-MB-231 cells overexpressing WIP or WIP $\Delta$ NBD (eGFP, green) were plated on rhodamine-gelatin (red, 5 h), fixed and stained for cortactin (cyan). (b) shWIRE cells overexpressing WIP, WIP- $\Delta$ CBD, WIP- $\Delta$ NBD or WIP- $\Delta$ WBD (eGFP, green). Arrows indicate invadopodia.

## REFERENCES

1. Neve, R. M. et al. A collection of breast cancer cell lines for the study of functionally distinct cancer subtypes. *Cancer Cell* **10**, 515-527 (2006).
2. Charafe-Jauffret, E. et al. Gene expression profiling of breast cell lines identifies potential new basal markers. *Oncogene* **25**, 2273-2284 (2006).

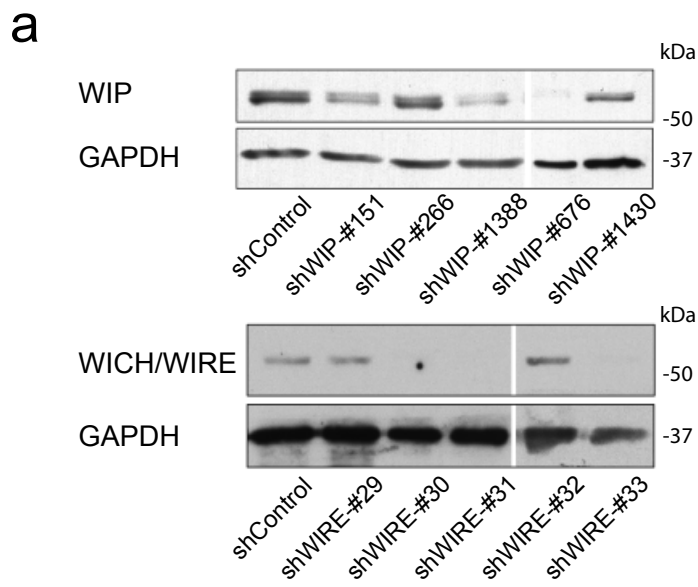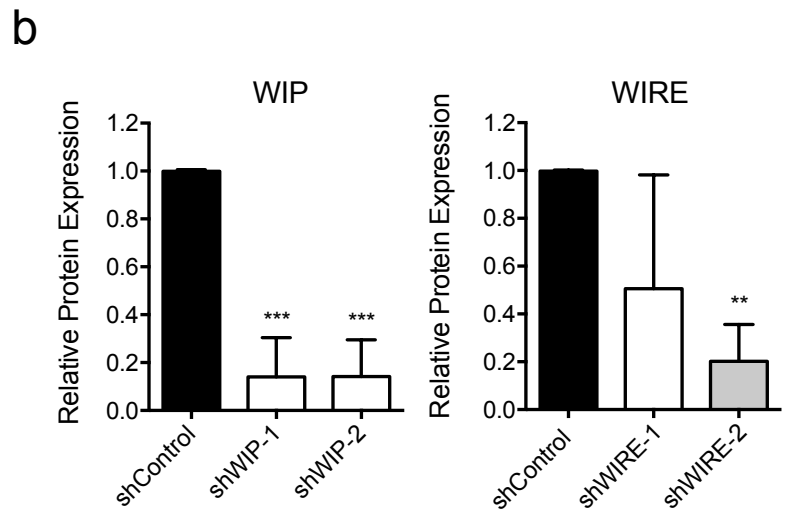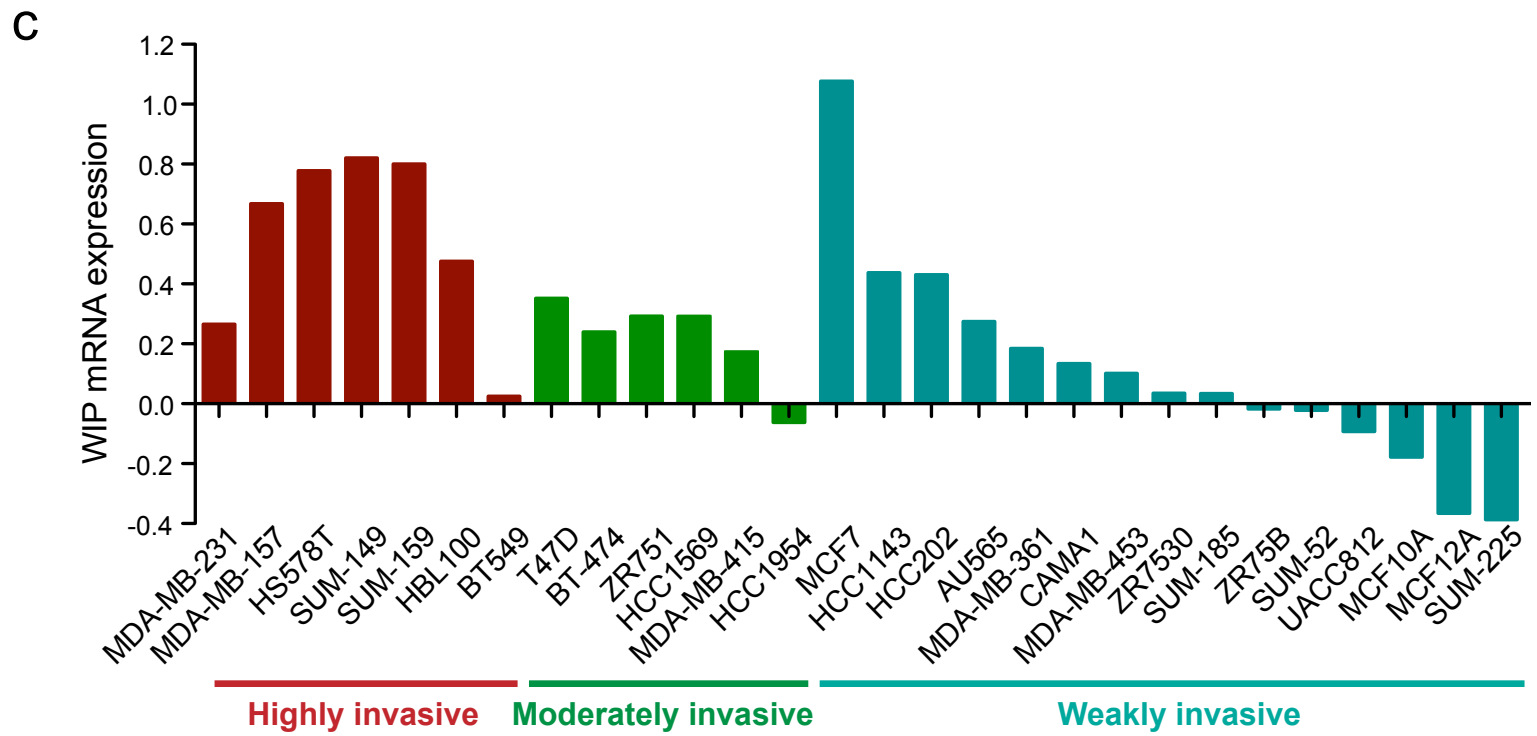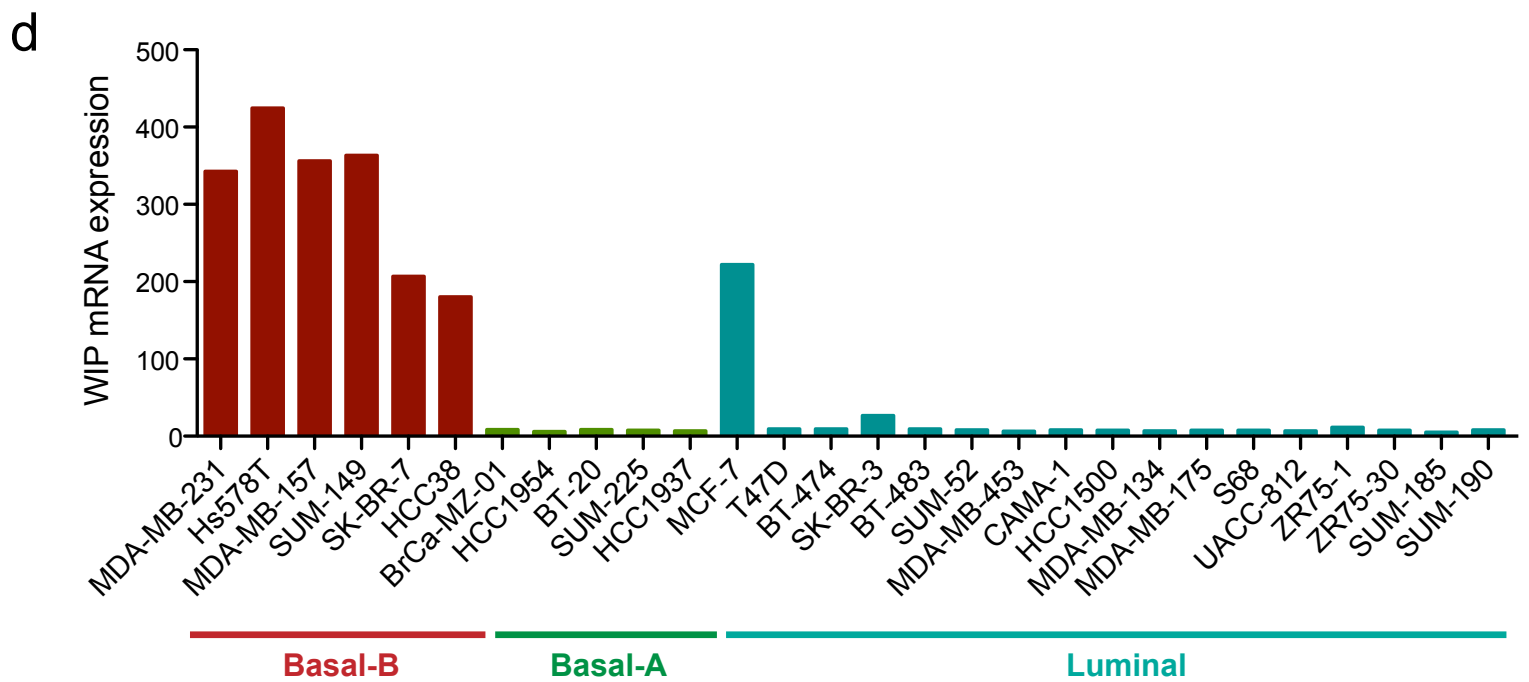

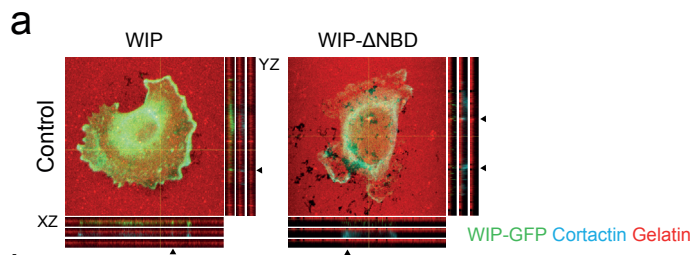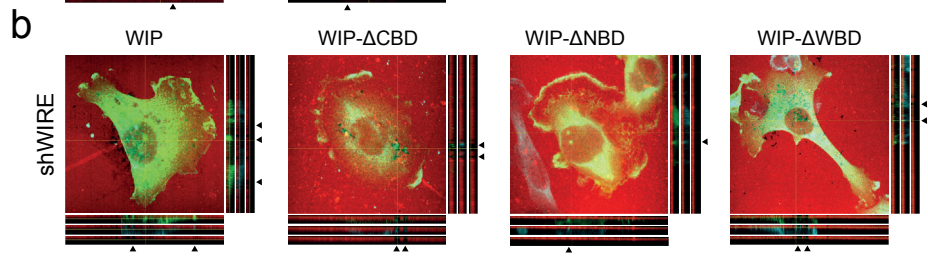

Supplement: srep23590-s1.pdf [file srep23590-s1.pdf]
